# Supplementary material for: Precise analysis of sub-ppm trace elements in olivine by LA-ICP-MS and application to metamorphic olivine from serpentinite
Source: Royal Society of Chemistry journal article supplement (doi:10.1039/d5ja00335k), 2026-01-01
Supplement: d5ja00335k1.xlsx [file d5ja00335k1.xlsx]

## Sheet: Table S1
Table S1 LA-ICP-MS analysis parameters of Set A, B, C.
	Set A	Set B	Set C
ICP-MS	Agilent 7900		Element XR
Cone	Standard sample cone and Ni skimmer cone		Standard sample cone and X skimmer cone
Laser	Coherent GeoLas HD		Coherent GeoLas Pro
Beam diameter	44	160	120
(μm)
Frequency (Hz)	10	20	15
Energy density	6	6	14
(J/cm2)
Pulses	400	600	400
Ablation cell	Ultra-fast multi-outlet laser ablation cella		Standard cell
Calibration standards	BCR-2G, BHVO-2G, BIR-1G		BHVO-2G,
			GRO132-G
Monitor standards	GOR132-G, KL2-G, MongOL Sh11-2	GOR132-G,	KL2-G,
		MongOL Sh11-2	MongOL Sh11-2
Software	ICPMSDataCal
Internal element	Si (Measured by EPMA)
Additional gas	N2		N2
Isotopes measured (m/z)	7Li, 27Al, 29Si, 31P, 43Ca, 45Sc, 49Ti, 51V, 52Cr, 55Mn, 59Co, 60Ni, 65Cu, 66Zn, 71Ga, 89Y, 90Zr, 140Ce, 157Gd, 173Yb	7Li, 25Mg, 27Al, 29Si, 31P, 44Ca, 45Sc, 47Ti, 51V, 52Cr, 55Mn, 57Fe, 59Co, 60Ni, 63Cu, 66Zn, 71Ga, 72Ge, 85Rb, 88Sr, 89Y, 90Zr, 93Nb, 137Ba, 139La, 140Ce, 141Pr, 146Nd, 147Sm, 153Eu, 157Gd, 159Tb, 163Dy, 165Ho, 166Er, 169Tm, 173Yb, 175Lu, 178Hf, 181Ta	23Na, 29Si, 31P, 45Sc, 47Ti, 51V, 63Cu, 66Zn, 71Ga, 72Ge, 89Y, 90Zr, 93Nb, 137Ba, 140Ce, 147Sm, 157Gd, 163Dy, 165Ho, 166Er, 169Tm, 173Yb, 175Lu, 179Hf, 181Ta
Dwell times	2 ms for Al, Si；100 ms for Ga, Ce, Gd, Yb, 7 ms for other elements.	2 ms for Mg, Si, Fe; 5 ms for P, Mn, Co, Ni, Zn; 7 ms for Li, Al, Ca, Sc, Ti, V, Cr, Cu, Ga, Ge, Y, Zr, 20 ms for Rb; 30 ms for Sr; 50 ms for Nb, Ba, Tb, Dy, Ho, Er, Tm, Yb; 70 ms for Eu, Gd, Lu; 100 ms for La, Nd, Hf, Ta; 200 ms for Ce, Pr, Sm.	10 ms for Si, P, Sc, Ti, V, Cu, Zn, Ga, Ge, Y, Zr, Nb, Ba; 30 ms for Ce, Sm, Gd, Dy, Ho, Er, Tm, Yb, Lu, Hf, Ta.
a Hu, Z., Chen, L., Shi, G., Luo, T., Zhang, W., Zong, K., & Liu, Y. Ultra-fast multi-outlet laser ablation cell. Chinese Patent ZL201710338858.2.

## Sheet: Table S2
Table S2 Detection limits (ppm) and mean background signals (CPS) of Olivine LA-ICP-MS trace element analysis under conditions of Sets A, B, and C.
	Set A		Set B		Set C
Elements	Detection limits	Mean Background of JAN10A11	Detection limits	Mean Background of APR29A06	Detection limits	Mean Background of APR13B007
	ppm	CPS	ppm	CPS	ppm	CPS
Li	0.06	148.355	0.0039	63.4933	n.a.	n.a.
Na	n.a.	n.a.	n.a.	n.a.	0.41	1.2624e+07
MgO*	n.a.	n.a.	9e-05	305.613	n.a.	n.a.
Al	0.4	423.088	0.029	240.746	0.075	547538
SiO2*	0.034	285037	0.0015	12005.2	0.05	3225929
P	n.a.	n.a.	0.75	5200.99	n.a.	n.a.
Ca	38.9	274.731	0.83	2633.59	n.a.	n.a.
Sc	0.026	482.058	0.0025	44.4444	0.0073	59862.2
Ti	0.1	10.9892	0.011	11.1111	0.088	41089.8
V	0.03	305.133	0.0018	77.7783	0.0035	9419.12
Cr	2.1	48667.7	0.044	3867.23	n.a.	n.a.
Mn	0.63	101891	0.024	3033.69	n.a.	n.a.
FeO*	n.a.	n.a.	7e-05	305.565	n.a.	n.a.
Co	0.011	32.9677	0.0014	22.2228	n.a.	n.a.
Ni	0.22	884.646	0.015	33.3333	n.a.	n.a.
Cu	0.015	17.9492	0.0052	39.6833	0.006	19986.1
Zn	0.19	598.917	0.0067	0	0.03	6582.68
Ga	0.003	18.0769	0.0005	0	0.002	846.44
Ge	n.a.	n.a.	0.027	444.454	0.02	34680
Rb	n.a.	n.a.	0.0011	47.2222	n.a.	n.a.
Sr	n.a.	n.a.	8e-05	3.70389	n.a.	n.a.
Y	0.0004	0.384615	5e-05	0	0.0003	96.28
Zr	0.001	0	5e-05	0	0.001	318.12
Nb	0.0005	0.769231	5e-05	0	0.00015	20.08
Ba	n.a.	n.a.	0.00022	1.11111	n.a.	n.a.
La	n.a.	n.a.	3e-05	0.555556	n.a.	n.a.
Ce	0.0003	0	3e-05	0.555556	0.00018	173.28
Pr	n.a.	n.a.	2e-05	0.277778	n.a.	n.a.
Nd	n.a.	n.a.	0.00012	0	n.a.	n.a.
Sm	n.a.	n.a.	0.00012	1.11111	0.00026	7.96
Eu	n.a.	n.a.	4e-05	0.793889	n.a.	n.a.
Gd	0.0015	0.769231	0.00018	0	0.00071	58.44
Tb	n.a.	n.a.	2e-05	0	n.a.	n.a.
Dy	n.a.	n.a.	0.0001	0	9e-05	7.92
Ho	n.a.	n.a.	2e-05	0	7e-05	15.92
Er	n.a.	n.a.	7e-05	1.11111	6e-05	2.64
Tm	n.a.	n.a.	3e-05	0	4e-05	3.96
Yb	0.0017	0.384615	0.00017	0	0.00025	11.92
Lu	n.a.	n.a.	2e-05	0	4e-05	5.28
Hf	n.a.	n.a.	9e-05	1.66667	0.00022	0
Ta	n.a.	n.a.	5e-05	0	9e-05	35.96
“*” represents wt%; “n.a.” repersents elements not analyzed.

## Sheet: Table S3
Table S3 Trace element results of monitor standards under Set A.
File name	Sample name	SiO2	Li	Al	Ca	Sc	Ti	V	Cr	Mn	Co	Ni	Cu	Zn	Ga	Y	Zr	Nb	Ce	Gd	Yb
		wt%	ppm	ppm	ppm	ppm	ppm	ppm	ppm	ppm	ppm	ppm	ppm	ppm	ppm	ppm	ppm	ppm	ppm	ppm	ppm
JAN11A008	SH11-2	40.3338	2.08876	288.665	787.71	4.061	45.8418	5.6826	129.899	1213.2	149.378	2789.61	1.69533	65.8859	0.0944858	0.0783289	0.0578366	0.0037769	0.000968094	-	0.0416211
JAN11A049	SH11-2	40.3338	2.10882	276.895	735.924	3.91055	42.7591	5.43876	128.44	1182.76	150.637	2862.09	1.68098	64.9093	0.0943819	0.0785772	0.0481599	0.00335192	0.000127747	0.002036	0.0266669
JAN11B08	SH11-2	40.3338	2.20918	268.837	728.638	3.69009	42.8629	5.39718	126.97	1185.5	148.339	2916.49	1.80759	64.7094	0.102852	0.0730142	0.0467408	0.0071141	0.000340898	0.00258322	0.0303931
JAN11B23	SH11-2	40.3338	2.15894	268.254	758.019	3.54999	41.7299	5.43925	125.889	1224.39	150.669	2860.71	1.75476	53.0595	0.111229	0.0702125	0.0496623	0.00218857	-	0.00355681	0.0239762
JAN11B56	SH11-2	40.3338	1.99519	268.714	732.286	3.63758	39.9393	5.48692	128.249	1199.59	152.752	2994.86	1.86809	64.3592	0.104759	0.0711348	0.0541553	0.00361483	0.000493467	0.00160855	0.0282283
JAN17A08	SH11-2	40.3338	2.1142	277.937	741.038	3.84113	41.8795	5.54662	132.114	1192.52	147.877	2928.87	2.12363	60.1327	0.102854	0.0762549	0.0331566	0.00592702	0.0053272	0.00289919	0.0338969
JAN17A23	SH11-2	40.3338	1.98591	267.412	716.113	3.68224	41.195	5.46476	133.673	1199.98	149.736	2917.96	2.07456	63.362	0.0939972	0.0742196	0.0477207	0.00398848	-	0.000568262	0.0313812
JAN17A58	SH11-2	40.3338	2.07479	279.239	739.091	3.7243	42.219	5.5418	132.245	1184.32	150.407	3032.01	2.12149	64.3693	0.0980061	0.0764626	0.0474798	0.00398814	0.000433805	0.00178599	0.0318617
JAN18A08	SH11-2	40.3338	2.03783	277.665	752.175	3.78628	42.8082	5.46573	127.648	1184.76	151.947	2993.87	2.00381	64.4096	0.103051	0.0741153	0.0416526	0.00528895	0.000327159	0.00262035	0.0311921
JAN18A24	SH11-2	40.3338	1.96758	276.513	746.455	3.75061	42.5118	5.55099	126.263	1182.27	149.747	3003.78	2.05197	63.3935	0.0970535	0.0752028	0.0390311	0.0018567	-	0.00209879	0.0302992
JAN18A57	SH11-2	40.3338	2.05406	274.946	745.147	3.59412	41.0901	5.50683	126.63	1186.26	152.05	2943.81	1.97895	63.8429	0.100063	0.0754506	0.0500652	0.00424644	0.000533267	0.00122348	0.0269516
JAN18B08	SH11-2	40.3338	1.97916	279.952	724.25	3.63429	43.7816	5.61845	132.107	1183.38	149.067	2966.14	2.13565	64.3118	0.104276	0.0752526	0.0437937	0.00397324	0.000404433	0.00083106	0.0320474
JAN18B22	SH11-2	40.3338	2.09582	271.374	734.548	3.57719	40.196	5.53232	124.811	1181.4	149.636	3019.35	2.04283	64.7285	0.10081	0.0736824	0.0523939	0.00328635	0.000107796	0.00118624	0.0312846
JAN18C08	SH11-2	40.3338	2.05842	268.34	683.479	3.42858	41.9419	5.51734	139.258	1171.75	150.38	2945.03	2.17749	62.8089	0.10048	0.0735324	0.043492	0.00363196	0.000263358	0.001722	0.0323453
JAN18C23	SH11-2	40.3338	2.0721	263.253	674.503	3.37836	40.0938	5.46864	130.895	1167.92	151.109	2934.66	2.0808	-	0.102048	0.0722157	0.0489368	0.00327833	-	0.00236179	0.0265664
JAN18C51	SH11-2	40.3338	2.07245	271.681	694.906	3.55733	42.1651	5.46274	132.796	1166.23	150.253	2917.19	2.01434	64.4223	0.10103	0.0762035	0.0502304	0.00309548	0.000849495	0.00201658	0.0311812
JAN10A10	SH11-2-1	40.3338	2.0869	270.458	737.152	3.8537	42.3501	5.48565	126.383	1175.92	150.839	2868.83	1.74145	63.0105	0.102527	0.0737196	0.0360122	0.00386672	0.000604333	0.000817924	0.0246258
JAN10A11	SH11-2-2	40.3338	1.91793	268.35	670.61	3.76058	41.4311	5.35011	127.08	1168.61	149.463	2853.13	1.55319	61.3467	0.105887	0.0743266	0.0443483	0.0049681	0.000553403	0.00287539	0.0303832
JAN10A12	SH11-2-3	40.3338	2.12951	267.276	739.905	3.85243	42.8795	5.44992	128.61	1184.09	150.854	2878.15	1.68331	64.8015	0.100992	0.0725839	0.065781	0.00348351	0.000842396	-	0.0266414
JAN10A13	SH11-2-4	40.3338	2.09103	261.083	671.748	3.72668	41.4316	5.29466	127.348	1164.87	149.299	2839.59	1.63912	62.4039	0.105538	0.0718506	0.0560811	0.00411686	0.000353092	-	0.0265745
JAN10A14	SH11-2-5	40.3338	1.99267	266.424	760.706	3.74189	39.2935	5.25213	124.908	1162.33	148.949	2821.95	1.6792	63.6687	0.0958128	0.0738051	0.0484458	0.00472673	0.000280589	0.00093715	0.024212
MAY30A08	SH11-2	40.3344	2.01271	271.41	708.689	3.79253	38.9446	5.57586	126.879	1164.29	144.779	2948.66	1.65094	57.1931	0.0978242	0.0727686	0.0431914	0.00313469	0.00180348	0.00165877	0.0295749
MAY30A24	SH11-2	40.3344	2.11636	273.113	722.879	3.74275	40.3715	5.49968	128.101	1153.18	145.702	2950.12	1.68543	62.3869	0.106687	0.0757064	0.0474844	0.0035045	0.000555572	0.00169529	0.0308161
MAY30A41	SH11-2	40.3344	2.1061	278.327	708.344	3.69992	39.8548	5.47306	125.257	1156.89	145.884	2919.96	1.60948	64.0882	0.0998557	0.0726478	0.0414713	0.00868749	0.00119555	0.000964606	0.0312218
MAY30A56	SH11-2	40.3344	2.03346	279.879	746.331	3.66403	41.6295	5.51661	127.766	1170.06	147.656	2987.59	1.73852	61.09	0.0999659	0.0745598	0.0441125	0.00291526	0.000298272	0.00145752	0.0318327
MAY30A70	SH11-2	40.3344	2.02345	277.831	707.2	3.62608	41.7074	5.53867	128.638	1164.57	144.001	2947.7	1.63828	62.0502	0.0974158	0.0738856	0.056542	0.0104684	0.000930809	0.00164134	0.0288549
JAN10A07	GOR132-G	45.5056	9.85482	62842.3	59465.8	36.6875	1732.91	215.848	2380.76	1229.06	95.0654	1205.51	223.884	59.239	11.587	13.677	10.3879	0.0943846	0.449463	1.25281	1.54262
JAN10A51	GOR132-G	45.5056	9.97747	60617.3	63101.2	39.5312	1845	231.901	2423.65	1260.37	91.122	950.57	221.938	60.454	11.7066	15.0466	10.9367	0.06061	0.371023	1.38312	1.75889
JAN11A006	GOR132-G	45.5056	9.87562	63860.2	59097.1	35.3883	1747.1	217.609	2340.44	1245.95	95.8881	1178.86	224.58	57.8677	11.8595	13.1735	10.0723	0.13778	0.503558	1.17367	1.52977
JAN11A051	GOR132-G	45.5056	9.6428	65163	60557.1	36.8114	1775.49	217	2346.09	1209.87	96.8902	1233.93	217.408	54.0477	11.8924	13.3648	10.0428	0.124545	0.476349	1.19734	1.57983
JAN11B06	GOR132-G	45.5056	10.1041	65055.2	61823.3	36.6692	1769.19	214.909	2334.05	1218.44	94.0932	1197.81	231.206	54.8076	12.1194	13.6174	10.4709	0.148408	0.505958	1.25663	1.61959
JAN11B58	GOR132-G	45.5056	9.81028	60862.4	60367.1	35.6758	1762.62	217.771	2367.24	1217.34	95.068	1232.44	219.939	52.9973	11.6284	13.3382	10.1525	0.090378	0.440305	1.19444	1.58929
JAN17A06	GOR132-G	45.5056	9.90253	59803.8	60632.1	37.0697	1762.32	220.791	2417.16	1208.18	96.3861	1277.98	212.45	58.9676	11.5706	13.7142	10.3916	0.0796604	0.407427	1.23584	1.63744
JAN17A60	GOR132-G	45.5056	9.78832	64491.9	63824.7	38.4864	1805.93	223.048	2561.22	1221.42	96.5594	1272.99	218.29	58.9465	11.732	14.0469	10.7885	0.106725	0.469727	1.28403	1.63281
JAN18A06	GOR132-G	45.5056	10.0499	65269.9	61303.9	37.3023	1796.69	221.597	2452	1236.94	97.6488	1258.81	231.727	59.5823	12.6518	14.0306	10.643	0.122432	0.499482	1.26186	1.61978
JAN18B06	GOR132-G	45.5056	9.80603	60748.8	59927.7	37.1312	1770.66	221.168	2402.3	1203.24	95.3472	1259.38	214.294	57.8152	11.7831	13.6579	10.7162	0.097579	0.446297	1.22827	1.60494
JAN18C06	GOR132-G	45.5056	9.74075	58077.8	59074.8	36.7416	1723.53	219.357	2520.25	1196.51	98.1187	1295.25	219.857	55.6209	11.5661	13.8235	10.5513	0.0603239	0.370426	1.18975	1.59931
MAY30A06	GOR132-G	45.5056	9.7679	58687.4	60722.6	36.2827	1693	217.83	2460.61	1232.51	94.6144	1218.78	212.425	66.4039	11.0493	13.602	10.3111	0.0607327	0.384184	1.22144	1.60879
MAY30A72	GOR132-G	45.5056	9.71993	59349.8	62341.7	37.7363	1776.2	222.412	2477.3	1226.14	96.1625	1249.32	215.933	67.3164	11.2198	14.1638	10.7689	0.0590495	0.396153	1.27089	1.63786
JAN10A08	KL2-G	50.3062	5.96952	73038.4	78958.9	32.3418	15917.9	311.302	291.672	1313.07	41.4087	110.222	90.8718	81.664	20.8033	26.3553	156.681	15.3697	32.7288	6.04198	2.09305
JAN10A49	KL2-G	50.3062	5.75522	73011.9	78496.2	32.4923	15451.7	313.875	291.529	1307.4	42.1163	108.605	88.0152	81.1069	20.7446	26.3979	157.302	15.4495	33.5465	6.20381	2.1322
JAN11A007	KL2-G	50.3062	5.86383	73144	80191.5	31.8374	15289.5	313.671	290.377	1343.87	43.4071	109.919	92.3657	84.6063	21.5413	26.1741	153.934	15.1834	33.3208	6.12686	2.12797
JAN11A050	KL2-G	50.3062	5.71989	73156.5	80019.6	32.6063	15603.2	314.795	288.832	1318.51	41.8328	110.751	93.1373	82.2604	21.0099	25.8789	156.164	15.0473	32.8259	5.97978	2.13835
JAN11B07	KL2-G	50.3062	5.89602	69899.7	78682.6	31.0455	15382.8	308.406	286.307	1309.88	41.7684	109.295	91.9181	83.4509	20.5964	25.1774	152.222	14.986	32.6467	5.95171	2.06307
JAN11B57	KL2-G	50.3062	6.10079	72127.9	81263	32.3708	15698.9	318.322	293.515	1342.03	42.7742	110.855	94.3194	83.8223	21.5516	25.9846	154.988	15.4652	33.2791	6.06874	2.1349
JAN17A07	KL2-G	50.3062	5.93316	71026.3	80088.4	31.8374	15337.8	316.716	285.702	1338.7	42.8635	109.002	92.1028	87.5183	21.2598	25.4528	153.659	15.2201	33.0015	5.96295	2.06547
JAN17A59	KL2-G	50.3062	5.55693	71917.1	82136.7	32.6645	15604.1	317.628	297.58	1340.54	42.5492	112.328	93.7316	84.9892	20.8411	26.0707	157.516	15.4483	33.3046	6.12725	2.08385
JAN18A07	KL2-G	50.3062	5.67156	70408.7	77100.1	31.7093	15293.2	310.267	291.031	1332.13	42.7834	112.262	94.8266	85.0646	21.2454	25.6095	153.076	14.9755	32.4802	5.78292	2.01512
JAN18A58	KL2-G	50.3062	5.75358	71657.6	79283.3	31.9929	15420.7	314.059	284.985	1349.73	43.1175	110.241	87.7435	84.7342	21.1523	25.7299	153.169	15.2072	33.063	5.84847	2.02675
JAN18B07	KL2-G	50.3062	5.84645	70808.5	78323.8	32.1178	15738	317.119	295.547	1344.94	43.128	113.011	92.2747	86.4734	21.357	25.7396	155.54	14.8752	32.3177	5.99395	2.0502
JAN18C07	KL2-G	50.3062	5.6221	69964.7	79609.2	32.3608	15192.4	314.267	306.676	1328.24	42.4936	111.482	96.3744	85.2322	21.612	26.6126	159.803	15.1262	33.2113	6.1838	2.07466
JAN18C52	KL2-G	50.3062	6.03617	69919.2	77830.5	32.0746	15265.6	312.503	291.871	1313.1	42.9204	111.047	89.6901	83.4407	21.0825	26.1719	157.888	15.1117	33.1307	6.15128	2.11438
MAY30A07	KL2-G	50.3062	5.71676	69374.7	76633.1	30.5512	14758.7	305.493	282.903	1317.2	41.9719	109.386	90.9298	101.853	20.3894	25.007	149.496	14.6077	32.2264	5.75277	1.99969
MAY30A71	KL2-G	50.3062	5.63657	69925.7	78087.1	31.1409	15371.8	312.125	286.982	1322.88	42.6879	111.536	91.9061	101.959	20.3207	25.6835	152.851	15.1589	33.1643	5.8838	2.03847

## Sheet: Table S4
Table S4 Trace elements results of monitor standards under Set B.
File name	Sample name	Fo	Li	B	Na	MgO	Al	SiO2	P	Ca	Sc	Ti	V	Cr	Mn	FeO	Co	Ni	Cu	Zn	Ga	Ge	Rb	Sr	Y	Zr	Nb	Ba	La	Ce	Pr	Nd	Sm	Eu	Gd	Tb	Dy	Ho	Er	Tm	Yb	Lu	Hf	Ta
			ppm	ppm	ppm	wt%	ppm	wt%	ppm	ppm	ppm	ppm	ppm	ppm	ppm	wt%	ppm	ppm	ppm	ppm	ppm	ppm	ppm	ppm	ppm	ppm	ppm	ppm	ppm	ppm	ppm	ppm	ppm	ppm	ppm	ppm	ppm	ppm	ppm	ppm	ppm	ppm	ppm	ppm
JUN20A050	GOR132-G	78.9346	10.1722	20.0869	6186.85	23.0232	62095.1	43.8343	137.607	58560.6	35.358	1714.1	209.798	2429.47	1206.46	10.9523	96.3321	1245.55	210.949	59.2869	12.1987	0.779149	2.15137	14.353	12.9972	9.69747	0.133263	1.24347	0.0882708	0.488364	0.0867597	0.666201	0.495322	0.245967	1.17073	0.2689	2.12596	0.504513	1.54288	0.233894	1.49514	0.231489	0.336837	0.0324113
APR29C23	GOR132-G	79.4901	9.64564	-	-	22.3056	62582.8	45.6364	133.431	61317.9	36.7386	1732.31	217.622	2536.4	1214.39	10.2589	96.9916	1244.12	223.821	64.1076	12.2534	0.754545	2.17195	14.5556	13.0132	9.77407	0.110475	1.19116	0.0879347	0.468274	0.0875605	0.685204	0.514306	0.250052	1.18499	0.264767	2.15198	0.480552	1.57888	0.228064	1.52128	0.23702	0.346006	0.0329808
APR29A04	GOR132-G	79.6439	9.70009	-	-	21.1307	59702.3	45.5056	140.922	60543.4	37.9477	1704.45	218.483	2475.85	1167.79	9.62706	95.7719	1166.93	213.929	71.6978	11.4447	0.744828	2.14712	14.6012	13.5606	10.2239	0.0778994	0.996215	0.0874041	0.419881	0.0887906	0.676803	0.518374	0.25191	1.21262	0.274892	2.17977	0.50619	1.60127	0.242694	1.67369	0.242436	0.349682	0.0310347
APR29A28	GOR132-G	80.1943	9.49184	-	-	22.9466	58778	45.5056	144.332	60945.5	38.2145	1765.83	222.472	2553.24	1197.2	10.1019	97.1076	1240.02	216.308	73.4335	11.4082	0.765391	2.17888	14.6944	13.874	10.3924	0.0673063	0.916752	0.0879066	0.388456	0.0875092	0.713326	0.51698	0.258292	1.21594	0.285463	2.19159	0.518361	1.59025	0.23835	1.70572	0.242879	0.352378	0.0265676
APR29A55	GOR132-G	78.349	9.56145	-	-	21.5582	61539.8	45.5056	141.448	61013.7	38.0087	1706.29	222.295	2539.9	1188.28	10.6193	95.6198	1201.63	217.596	67.4216	11.8865	0.838585	2.13331	14.6221	13.7341	10.402	0.0878023	1.15027	0.0879313	0.460198	0.0883505	0.694568	0.519572	0.253061	1.19706	0.272017	2.18443	0.503043	1.57935	0.237392	1.63496	0.240551	0.350569	0.0304747
APR29A098	GOR132-G	78.7104	9.41718	-	-	21.8165	58749	45.5056	136.17	62278.9	37.6815	1781.91	224.719	2569.33	1232.86	10.5186	96.525	1173.34	225.503	66.4864	11.0148	0.726674	2.08092	14.6683	13.7595	10.0254	0.0557166	0.771071	0.079908	0.35256	0.0848259	0.711677	0.527023	0.253376	1.24528	0.279847	2.22032	0.517879	1.61994	0.249572	1.6546	0.246777	0.353602	0.0264885
JUN20A006	KL2-G	54.2563	5.72437	5.40112	17260.6	7.24831	70164.9	51.3461	1216.57	78005.4	31.4246	15134.1	305.459	291.575	1343.32	10.8932	43.0758	113.775	94.3316	105.057	21.5134	1.44303	8.73921	349.496	24.9077	144.345	14.7111	115.033	12.9058	32.4175	4.61186	21.3513	5.49859	1.93075	5.80605	0.882799	5.15869	0.975788	2.51545	0.349789	1.99153	0.286191	3.89635	0.851411
JUN20A049	KL2-G	53.5486	5.89582	3.59973	17230.9	7.63447	70916.3	49.8719	1261.02	77477.5	31.6543	15556.9	311.809	296.441	1362.53	11.805	44.0646	116.745	93.0866	99.7585	21.1909	1.27341	8.68734	357.628	25.8615	154.847	15.0441	119.439	13.1489	32.4029	4.69938	21.9304	5.59864	1.92315	5.89462	0.906866	5.34315	0.985391	2.58605	0.344659	2.02328	0.289558	3.93502	0.846777
APR29A05	Sh11-2-21	89.6905	2.01775	-	-	48.0809	275.091	40.44	65.5177	726.055	3.62409	40.4639	5.50958	127.831	1114.21	9.85145	149.106	2742.82	1.14348	67.0745	0.102877	0.524013	-	-	0.0699916	0.0503909	0.00209233	-	4.77624e-05	0.000332754	0.00011092	0.000685926	0.000188121	0.000166837	0.00215469	0.000781874	0.00580688	0.00297402	0.0144973	0.00284002	0.0310706	0.00699013	0.00112093	6.39118e-05
APR29C03	Sh11-2-21	89.4686	2.08729	-	-	48.5659	267.602	40.2224	58.0953	711.89	3.38899	39.8144	5.20494	129.487	1130.99	10.1902	155.268	2917.17	1.24787	60.8525	0.0892258	0.586301	-	0.00752717	0.0680384	0.0336382	0.00269791	0.000399226	0.000166406	0.000423098	-	0.00128432	0.000804889	0.000299228	0.00158133	0.000636306	0.00755544	0.00230366	0.0111018	0.00322844	0.0271658	0.00720203	0.000800355	8.42661e-05
APR29A06	Sh11-2-22	89.7191	2.13533	-	-	48.5108	280.208	40.44	65.1444	743.951	3.6258	40.4906	5.42789	129.552	1120.43	9.90881	152.036	2766.62	1.14954	65.446	0.107402	0.56445	-	0.00857102	0.0780101	0.047447	0.00331967	4.3681e-05	4.63877e-06	0.000329211	0.000100309	0.000446673	0.000432889	0.000280712	0.0030396	0.000734549	0.0061841	0.00192949	0.00932893	0.002783	0.0303262	0.0069801	0.000703011	1.86219e-05
APR29C04	Sh11-2-22	89.6023	2.14921	-	-	48.9103	269.05	39.9576	59.6006	703.644	3.48665	38.9359	5.08879	128.207	1125.33	10.1171	153.716	2894.68	1.22152	62.761	0.0910265	0.611624	0.000192791	0.00771881	0.07208	0.0422573	0.00352713	0.000730874	4.90313e-05	0.000401236	9.80071e-05	0.000290671	0.000729651	0.000326945	0.000744833	0.000533576	0.00678228	0.00198847	0.00971247	0.00319268	0.0325809	0.00727121	0.000769661	6.93962e-05
APR29A07	Sh11-2-23	89.5858	2.04946	-	-	47.9138	278.639	40.44	63.6814	734.976	3.69664	40.8423	5.4619	129.203	1116.43	9.92859	151.127	2792.39	1.10914	63.1434	0.0845486	0.581022	-	0.00805441	0.0725572	0.0350914	0.00334646	0.000299254	8.47163e-05	0.000309145	4.39026e-05	0.000175688	0.000610621	0.000286408	0.00198996	0.000343901	0.00575315	0.00259884	0.0121702	0.0029768	0.0337186	0.00652139	0.00100766	8.62885e-05
APR29C05	Sh11-2-23	89.6249	2.15943	-	-	48.9554	273.196	39.9251	64.6361	720.952	3.55442	39.1946	5.23442	130.458	1129.83	10.1019	153.579	2879.04	1.08951	60.6109	0.0832167	0.533274	0.000108264	-	0.0717427	0.0513137	0.00383408	0.000451295	5.65041e-05	0.00037818	0.000131487	0.000626546	0.000491669	0.000310554	0.00172559	0.000693631	0.00567712	0.0025453	0.00950983	0.00326066	0.0351717	0.00703383	0.00124329	6.74978e-05
APR29A08	Sh11-2-24	89.5554	2.11508	-	-	48.0208	272.361	40.44	67.4655	717.908	3.59469	40.6277	5.35227	131.237	1120.65	9.98312	149.641	2777.49	1.21469	64.4443	0.0962909	0.618163	-	0.0072218	0.0769102	0.0378087	0.00331639	0.00151644	-	-	8.32026e-05	0.000381393	0.000491048	0.000427717	0.00133936	0.000365101	0.00605597	0.00208213	0.0114427	0.00311868	0.02932	0.00737297	0.00150988	-
APR29A09	Sh11-2-25	89.3765	2.10142	-	-	47.0785	273.155	40.44	64.8276	716.474	3.57532	39.8323	5.36244	130.016	1125	9.97479	152.431	2784.28	1.15236	66.1483	0.0975546	0.625591	-	0.00848297	0.0744488	0.0368398	0.00332612	0.000634377	0.000147459	0.00031704	0.000135974	0.000521389	0.0005263	0.000262037	0.00144783	0.000711952	0.00500391	0.00223933	0.0117476	0.00288448	0.0285513	0.00665408	0.0011858	4.1504e-05
APR29A10	Sh11-2-26	89.4872	2.10087	-	-	47.8401	277.038	40.44	65.08	730.628	3.65804	41.0455	5.5272	129.318	1123.46	10.0181	152.691	2805.63	1.1979	64.2697	0.0941436	0.558491	-	0.00884184	0.0705554	0.0346805	0.00448377	0.000396553	0.000273985	-	0.000154598	0.000708472	0.000672184	0.000541821	0.00130499	0.000686799	0.0085785	0.00250889	0.0141341	0.00319454	0.030613	0.00727768	0.000705977	8.42497e-05
APR29A12	Sh11-2-27	89.4809	2.0442	-	-	48.5228	276.018	40.44	65.0039	719.228	3.56498	40.2694	5.39655	130.693	1137.08	10.1679	153.964	2821.52	1.18127	64.4841	0.114953	0.594559	0.000946439	0.00657634	0.0762735	0.044944	0.00344034	0.00106541	0.000393425	-	-	0.000340886	0.000533271	0.000405155	0.000952397	0.000765655	0.00538824	0.00240661	0.0134052	0.00349974	0.0273335	0.00632299	0.00135897	0.000139002
APR29A13	Sh11-2-28	89.5249	2.05511	-	-	48.9899	275.422	40.44	71.0861	735.598	3.69228	40.0883	5.41291	131.691	1146.15	10.2178	154.107	2826.64	1.19181	70.6513	0.0845895	0.556142	0.000211908	0.00733653	0.0701225	0.0310469	0.00488754	0.000808819	8.69667e-05	0.000380823	0.000112342	0.000349035	0.000283163	0.000255513	0.000939699	0.000473917	0.00587096	0.0025132	0.0107574	0.0024315	0.0288409	0.0074697	0.00106736	-
APR29A14	Sh11-2-29	89.5588	2.11315	-	-	48.818	276.384	40.44	65.7851	733.315	3.75195	40.3127	5.44661	130.445	1150.71	10.1453	153.995	2824.6	1.24738	70.5148	0.113121	0.610597	0.000228121	-	0.0769922	0.0370946	0.00344856	0.000811785	0.000156264	0.000329528	5.83367e-05	0.000679238	0.000728866	0.000263087	0.00260679	0.000458669	0.00650773	0.00218324	0.0113198	0.00318	0.0312599	0.0070881	0.000762465	-
APR29A15	Sh11-2-30	89.757	2.03388	-	-	49.5132	280.032	40.44	66.6142	747.97	3.79271	41.225	5.60977	133.637	1179	10.072	154.687	2830.65	1.21316	71.523	0.104422	0.571468	0.000726936	-	0.0817666	0.0544836	0.00335411	0.00240323	0.000154136	0.000221464	7.51942e-05	0.00263859	0.000215818	0.000495303	0.0010967	0.00063582	0.00860625	0.00235843	0.0133082	0.00302323	0.0352701	0.00683469	0.000655721	6.30693e-05
APR29A16	Sh11-2-31	89.6345	2.16553	-	-	49.0058	276.582	40.44	69.4125	727.788	3.63028	40.4002	5.54001	130.009	1136.78	10.1018	153.574	2810.34	1.14924	71.1091	0.100948	0.606885	0.000224569	0.00623034	0.0735024	0.047776	0.00544956	-	3.92548e-05	0.000352993	6.65357e-05	0.000288052	0.000437452	9.06258e-05	0.00154547	0.000550212	0.00606168	0.00247195	0.0108813	0.00295501	0.0308103	0.00708219	0.000989462	3.97394e-05
APR29A17	Sh11-2-32	89.6905	2.08034	-	-	49.906	276.243	40.44	69.2616	736.442	3.67953	40.947	5.38595	131.122	1149.69	10.2254	153.922	2865.3	1.20194	67.555	0.0868638	0.632711	0.00100005	0.00688558	0.067239	0.0538127	0.00299321	0.000579988	5.71784e-05	0.000228837	3.14886e-05	0.000636484	0.000420853	-	0.00133946	0.000428735	0.00721618	0.00175612	0.0124684	0.00264006	0.0333281	0.00744163	0.00157282	5.78349e-05
APR29A18	Sh11-2-33	89.8636	2.11309	-	-	49.8052	271.704	40.44	62.4231	734.747	3.67426	39.9013	5.35466	127.16	1144.15	10.0142	152.983	2817.11	1.21327	71.3351	0.101797	0.585052	5.33707e-05	0.00727967	0.0841151	0.0515189	0.00265054	0.00058174	4.01281e-05	0.00026014	0.000103019	0.000455896	0.000249304	0.000332107	0.00207697	0.000582986	0.00663405	0.00280743	0.0118776	0.00274152	0.0334288	0.00730308	0.00101719	8.69013e-06
APR29A19	Sh11-2-34	89.8356	2.06943	-	-	49.4076	272.969	40.44	64.1033	726.815	3.69927	40.3435	5.36987	126.242	1128.61	9.96469	151.228	2800.7	1.10906	68.6631	0.102101	0.566861	0.00119598	0.00839434	0.0694778	0.0427933	0.00292604	-	0.000189392	0.000235978	6.44666e-05	0.000418467	0.000723738	0.000225948	0.0013469	0.000393972	0.00787224	0.00248674	0.0121313	0.00243106	0.0284387	0.00728394	0.000804114	3.58568e-05
APR29A20	Sh11-2-35	89.9707	2.04963	-	-	49.7423	278.859	40.44	75.7504	726.951	3.62003	39.5058	5.37328	125.584	1127.11	9.88402	152.585	2795	1.19019	68.9251	0.105289	0.571705	0.000120388	-	0.0737825	0.0398792	0.00578535	0.0015132	0.000548748	-	-	0.000644308	0.00155558	0.000349362	0.00219107	0.000718805	0.00637157	0.00301359	0.0114548	0.00292536	0.0296226	0.0071007	0.00158563	-
APR29A22	Sh11-2-36	90.0738	2.17438	-	-	50.2948	284.617	40.44	73.3261	723.164	3.56445	40.9335	5.37634	126.606	1124.3	9.8798	150.232	2775.87	1.1769	67.93	0.116082	0.61226	-	0.00863982	0.0726837	0.0382115	0.00385947	0.000894608	0.000143047	0.000474881	0.00012463	0.000630463	0.000522884	0.000369075	0.00191647	0.000658234	0.00574146	0.00205531	0.0113935	0.00258663	0.0317249	0.0071958	0.00101429	-
APR29A23	Sh11-2-37	90.0196	2.08454	-	-	50.7673	277.877	40.44	76.7465	725.077	3.68898	41.5533	5.38878	126.996	1126.9	10.0331	152.162	2812.43	1.17665	68.1776	0.0999758	0.553233	-	0.00706286	0.068325	0.0399301	0.00399843	0.00151369	-	-	0.00027478	0.00039506	0.000609235	0.000277607	0.00155537	-	0.00679211	0.00247723	0.0122999	0.003312	0.0310528	0.00700866	0.0107817	-
APR29A24	Sh11-2-38	90.0365	2.17495	-	-	51.1412	283.706	40.44	133.944	732.538	3.53025	41.4883	5.49926	127.279	1140.08	10.0879	152.72	2826.93	1.25338	68.5013	0.0832092	0.59415	-	0.00785998	0.0674251	0.0584487	0.00271293	-	7.20863e-05	0.000297429	0.000126944	0.000431489	0.00043936	-	0.00172056	0.000641417	0.0061624	0.00207877	0.0111216	0.00317723	0.0319899	0.00743445	0.000976459	0.00015703
APR29A25	Sh11-2-39	89.8752	2.10917	-	-	52.0532	283.969	40.44	67.0774	743.842	3.7256	43.6302	5.60569	134.405	1157.7	10.4528	154.392	2872.41	1.23947	71.7149	0.0729481	0.579554	0.000658069	0.00869077	0.0790405	0.0423886	0.00453595	-	0.000120279	0.000429634	9.96119e-05	0.000589073	0.000238631	0.00013274	0.00111837	0.000559689	0.00672095	0.00215244	0.0108088	0.00323061	0.032715	0.00657859	0.00115044	4.02747e-05
APR29A26	Sh11-2-40	89.8145	2.11949	-	-	51.6566	283.788	40.44	66.4725	752.671	3.65861	42.0134	5.4849	132.468	1150.71	10.4424	154.724	2873.19	1.17949	69.5305	0.0912126	0.595254	0.000100225	-	0.0818636	0.0562128	0.00455625	0.000929958	4.31027e-05	0.000277506	0.000129164	0.000189267	2.09143e-05	0.000339072	0.00167541	0.000475891	0.00610492	0.00248584	0.0132225	0.0027329	0.0334499	0.00703653	0.00100311	3.87856e-05
JUN20A008	Sh11-2-R1-1	89.4821	2.07526	0.608791	115.876	48.7624	270.798	39.9874	68.3992	743.089	3.67671	41.0532	5.37511	125.421	1122.77	10.2168	145.431	2845.17	1.14856	60.693	0.101245	0.658151	0.000331866	-	0.0678782	0.0406467	0.00396794	0.00102205	0.000184237	-	-	-	0.00050692	-	0.0014645	0.000656769	0.00665563	0.00232908	0.0120266	0.00353679	0.028795	0.00713748	0.000729499	0.000118793
JUN20A009	Sh11-2-R1-2	89.5716	2.13053	0.526258	117.216	48.9274	267.735	39.8895	66.0635	736.646	3.71551	41.0285	5.35578	125.489	1115.96	10.154	143.91	2849.14	1.13618	59.6284	0.107234	0.646383	0.00145783	0.00885924	0.078919	0.0367278	0.0045687	-	-	-	-	0.000775574	0.000811971	0.00038798	0.00169474	0.000736065	0.0053893	0.00294792	0.0124991	0.00384267	0.0301053	0.00744219	0.00142775	0.000258635
JUN20A010	Sh11-2-R1-3	89.5244	2.17708	0.634089	116.374	48.6416	272.305	40.1778	70.2261	735.996	3.75915	40.6378	5.44178	126.056	1124.97	10.1457	143.095	2877.17	1.15161	57.2206	0.0999759	0.634575	0.00133439	0.00795577	0.0706446	0.0349199	0.00298811	0.000496278	9.69795e-05	0.000328324	0.000138286	0.000572398	0.000446257	0.00037865	0.00151585	0.000452338	0.00499819	0.0024533	0.0101983	0.0028637	0.0252938	0.00664717	0.000805008	4.5832e-05
JUN20A011	Sh11-2-R1-4	89.4916	2.12213	0.415984	116.362	48.8468	272.474	39.8964	73.9558	730.957	3.67586	40.9795	5.33097	125.107	1101.67	10.2242	143.25	2865.46	1.16143	58.1992	0.0937494	0.660107	0.00010619	-	0.0699083	0.0393182	-	0.00110273	-	-	-	0.000841329	0.0004189	0.000193766	0.00144358	0.000502373	0.00566216	0.0024622	0.0108288	0.00300657	0.0322908	0.00631583	0.0005667	-
JUN20A012	Sh11-2-R1-5	89.4969	2.15363	0.361026	116.513	48.8709	268.025	39.8696	70.5309	736.488	3.77887	41.8064	5.36291	126.69	1125.92	10.2235	143.982	2870.97	1.24042	57.2653	0.102514	0.630494	0.000289616	0.00853955	0.0726601	0.0469199	-	0.000999675	-	0.000544869	0.000144271	0.00065264	0.000389298	0.000496489	0.00166359	0.000496651	0.00538735	0.00473807	0.0109365	0.00244039	0.0310037	0.00676712	0.000677123	6.87528e-05
JUN20A013	Sh11-2-R2-1	89.4779	1.91419	0.811153	115.43	49.1872	258.077	39.4687	66.4585	723.222	3.58377	40.3504	5.2431	119.506	1120.53	10.3104	145.315	2881.97	1.11204	60.5634	0.10072	0.595151	0.00107118	0.00877986	0.0717592	0.0350851	0.00343585	0.00125215	-	-	-	-	0.000324057	0.000340679	0.00200677	0.00107962	0.00644165	0.00288343	0.0117591	0.00328866	0.0336251	0.00741824	0.00129083	0.000128706
JUN20A015	Sh11-2-R2-2	89.3876	2.01794	0.606517	119.059	49.3591	262.402	39.1548	74.8081	722.574	3.59597	40.1053	5.3655	121.187	1121.64	10.4458	143.325	2880.06	1.16685	59.0576	0.0958994	0.682606	0.000276598	0.00773522	0.0758314	0.0427505	0.00273698	-	-	-	-	0.000884328	0.000637342	0.000515616	0.00159509	0.00071525	0.00755222	0.00258255	0.0104806	0.00320583	0.0311796	0.00720139	0.00119495	0.00017328
JUN20A016	Sh11-2-R2-3	89.4887	1.92297	0.269758	113.383	49.379	259.198	39.2483	64.227	714.737	3.58129	39.9956	5.16843	120.246	1128.6	10.3388	140.895	2891.56	1.11679	58.3869	0.0936723	0.668806	0.00175629	0.00755121	0.0687605	0.0392691	0.00318167	0.000500619	5.61723e-05	0.000239808	0.000122778	0.000175901	0.00037742	0.000289884	0.00117809	0.00039185	0.00546095	0.00211623	0.0109444	0.00271874	0.0307013	0.00640425	0.000650424	2.26263e-05
JUN20A017	Sh11-2-R2-4	89.6604	2.02852	0.323065	113.826	49.4545	260.859	39.3579	62.6241	708.859	3.547	40.3525	5.13426	118.408	1100.77	10.1659	141.756	2867.63	1.15808	58.702	0.0952922	0.632275	0.000553929	0.00624581	0.0646045	0.0363327	0.00331861	-	0.000141573	0.00038793	0.000122187	0.000830941	0.000156064	0.000346746	0.00153482	0.00057869	0.00733635	0.00199676	0.0118372	0.00325316	0.0286589	0.00690491	0.000707622	6.88041e-05
JUN20A018	Sh11-2-R2-5	89.3972	2.02243	0.343763	116.977	49.3985	268.042	39.1116	69.1442	723.032	3.57241	41.5208	5.31638	121.253	1126.36	10.4436	144.795	2925.95	1.16197	57.5328	0.102994	0.638738	0.000218925	0.00760052	0.0737161	0.0437665	0.0029624	0.000559735	0.000146709	0.000259932	0.000131317	0.000655826	0.000546804	0.000516222	0.00091475	0.00052806	0.00684894	0.00233695	0.0118907	0.00318521	0.0312656	0.00727869	0.00136862	0.000100466
JUN20A019	Sh11-2-R3-1	89.3905	2.09259	0.447089	120.985	49.2983	270.502	39.2305	81.8112	715.758	3.61697	41.5161	5.3117	122.546	1109.04	10.4298	143.039	2885.46	1.1064	57.5163	0.115644	0.613031	0.00133377	-	0.0740133	0.0372201	0.00503324	-	-	-	-	0.00130822	0.000772664	-	0.00113308	0.000732706	0.00689692	0.00263847	0.0130725	0.00310577	0.0320233	0.00709724	0.00097745	0.000151422
JUN20A020	Sh11-2-R3-2	89.4441	2.07622	0.390354	120.278	49.2309	264.946	39.3814	66.4356	726.998	3.67098	40.7371	5.32961	122.705	1090.86	10.3566	142.014	2868.57	1.14299	53.6791	0.0944267	0.604129	0.00243748	0.00856634	0.0783988	0.0402438	0.00298555	-	2.60478e-05	0.000430927	0.000157474	0.000519235	0.000331777	0.000260813	0.00230616	0.00068338	0.00721136	0.0027665	0.0122551	0.00295056	0.0260627	0.0067826	0.00119898	0.000153461
JUN20A021	Sh11-2-R3-3	89.4567	2.0862	0.294707	119.929	49.4429	269.205	39.1348	69.2552	721.587	3.56214	40.5293	5.25896	123.068	1097.86	10.3874	142.356	2876.68	1.07798	56.7114	0.0973604	0.617871	0.000915337	-	0.0762412	0.0465133	0.00361645	0.00149185	0.000171822	0.000256052	-	0.000641301	0.000557725	0.000535614	0.00149072	0.000668611	0.0068986	0.0026563	0.0109208	0.00343587	0.0309352	0.00704867	0.00128016	6.21849e-05
JUN20A022	Sh11-2-R3-4	89.5015	1.98983	0.360637	119.697	49.8301	267.076	38.7224	67.7039	712.572	3.67099	40.274	5.29809	122.342	1099.52	10.419	142.34	2836.42	1.14148	55.4597	0.0785124	0.615421	0.000108286	0.00937682	0.0752639	0.0492446	0.00337736	0.0015122	0.000143455	-	-	0.000531966	0.00043781	0.000316585	0.00196765	0.000594216	0.00655619	0.00222299	0.0109397	0.00312223	0.0277396	0.00648352	0.00107926	-
JUN20A023	Sh11-2-R3-5	89.434	2.16358	0.511147	118.776	49.7837	271.774	38.6925	80.8381	713.652	3.53053	40.4034	5.30384	122.328	1089.48	10.4842	143.34	2887.65	1.20277	54.22	0.100703	0.603627	0.000102122	-	0.0681878	0.0447505	-	0.00155301	-	-	9.38629e-05	0.00036429	0.000347155	0.000383343	0.00130195	0.000608836	0.00532571	0.00260912	0.0104193	0.00316847	0.0317022	0.00660422	0.00103247	4.55866e-05
JUN20A025	Sh11-2-R4-1	89.4525	2.10152	0.603127	111.642	49.5839	264.797	38.9617	70.6876	711.303	3.53163	41.578	5.08687	121.127	1080.01	10.4217	142.701	2895.69	1.15133	55.6349	0.0865026	0.584855	0.00338741	0.00976628	0.0710699	0.0445016	0.00305439	0.000521034	-	-	-	-	0.000852192	-	0.00213322	0.000569459	0.00596701	0.00218148	0.0129436	0.0033995	0.0334746	0.00725734	0.00110918	0.000753717
JUN20A026	Sh11-2-R4-2	89.4552	1.94274	0.337797	112.872	49.4552	265.031	39.1237	71.7688	717.702	3.54956	42.1452	5.20812	122.165	1083.22	10.3916	141.38	2866.52	1.16526	52.3966	0.087631	0.553683	0.000351762	0.00783297	0.0719779	0.0356819	0.00394352	0.000996441	0.000206788	0.000332195	-	0.000350838	0.000518298	0.000198053	0.00153506	0.000443899	0.00604241	0.00239199	0.0123	0.00334225	0.0302735	0.00730128	0.00105867	3.39554e-05
JUN20A027	Sh11-2-R4-3	89.5424	2.02798	0.440122	110.649	49.7204	260.391	38.9019	62.5253	713.28	3.52137	40.5754	5.22155	120.125	1079.77	10.3508	142.198	2887.29	1.16702	56.2479	0.101594	0.635415	-	0.00847362	0.0758429	0.0326694	0.00348783	-	0.0001362	0.00035297	6.6352e-05	0.000300833	0.000407841	-	0.000776132	0.000692226	0.00618825	0.00202192	0.0126874	0.003127	0.0275342	0.00709113	0.0014494	-
JUN20A028	Sh11-2-R4-4	89.4488	2.1298	0.275829	112.713	49.9236	260.308	38.5488	63.8103	705.402	3.54415	40.3378	5.16781	121.223	1083.51	10.4971	142.366	2884.64	1.18959	55.3285	0.0654266	0.63943	0.000748209	0.00780626	0.0707402	0.0378627	0.00394473	0.00120955	0.00012823	0.000377865	0.000120554	0.000213036	0.000448929	0.000240275	0.00135861	0.00061291	0.00508513	0.00239707	0.0124432	0.00284226	0.0327038	0.00694234	0.000580391	5.29393e-05
JUN20A029	Sh11-2-R4-5	89.3509	2.01564	0.960485	112.443	49.4782	264.382	38.9731	71.0251	717.353	3.53567	40.778	5.1808	120.954	1093.44	10.5116	141.967	2888.2	1.17635	57.061	0.081296	0.569437	0.000868582	0.00868903	0.0763777	0.0465643	0.00335852	0.00072368	-	-	0.000146549	0.000509968	0.000322148	0.000369453	0.00131258	0.000704429	0.0075618	0.00265967	0.014165	0.00269527	0.0298916	0.00763011	0.000509688	0.00012663
"-" repersents elements not analyzed or below detection limit.

## Sheet: Table S5
Table S5 Trace elements results of monitor standards under Set C.
File name	Sample name	Na	Al	SiO2	Sc	Ti	V	Cu	Zn	Ga	Ge	Y	Zr	Nb	Ce	Sm	Gd	Dy	Ho	Er	Tm	Yb	Lu	Hf	Ta
		ppm	ppm	%	ppm	ppm	ppm	ppm	ppm	ppm	ppm	ppm	ppm	ppm	ppm	ppm	ppm	ppm	ppm	ppm	ppm	ppm	ppm	ppm	ppm
APR13B007	SH11-2-2	114.542	208.383	40.3344	3.73162	44.7064	5.85818	1.19607	68.0873	0.117566	0.540094	0.0681422	0.0503329	0.00549755	0.00187045	0.00180665	-	-	0.00286275	0.0142209	-	0.0298136	-	0.00218169	-
APR13B008	SH11-2-3	112.655	208.137	40.3344	3.60497	44.1797	5.79959	1.24668	68.224	0.116086	0.558365	0.0683297	0.0471243	0.00579505	0.00247243		0.00279687	0.00752551	0.00353045	0.013094	-	0.0329367	0.00702033	0.00296545	-
APR13B009	SH11-2-4	105.476	205.999	40.3344	3.62609	43.9611	5.81839	1.21153	68.206	0.113874	0.57475	0.068197	0.0447022	0.00523382	0.00197507	0.00155374	-	-	0.00365127	0.0113565	-	0.0365005	-	0.00303165	-
APR13B010	SH11-2-5	112.131	203.86	40.3344	3.62793	44.1665	5.71934	1.19987	66.8589	0.108706	0.53594	0.0671778	0.049232	0.00496182	0.00114848	0.00129878	0.00210524	0.00741059	0.00276522	0.013384	0.00334897	0.0296847	0.00790125	0.00175251	-
APR13C007	SH11-2-2	105.644	206.928	40.3344	3.25647	41.7026	5.60263	1.20229	65.0984	0.110441	0.545114	0.0756571	0.0513338	0.00799351	0.00165141	-	-	0.00747843	0.00287809	0.0110594	0.00384274	0.0319632	-	-	0.00187258
APR13C008	SH11-2-3	108.331	203.752	40.3344	3.2211	40.5386	5.55306	1.22251	65.1123	0.110797	0.545431	0.0730639	0.0480459	0.00701175	0.0013796	-	-	0.00677229	-	0.0117752	0.00364893	0.0302887	0.00730266	-	-
APR13C009	SH11-2-4	106.628	201.629	40.3344	3.17548	39.8612	5.50923	1.19767	65.6697	0.10776	0.551973	0.0746559	0.046176	0.00577461	0.001135	0.00118796	-	0.00679249	0.00302607	0.0122485	0.00391008	0.0291726	0.00744031	0.000514782	-
APR13C010	SH11-2-5	107.177	205.327	40.3344	3.21775	40.4205	5.54049	1.20428	66.1533	0.113044	0.562246	0.0721507	-	0.00622781	0.00125274	0.000814681	0.0017546	0.00677525	0.00267118	0.0113041	0.00310432	0.0271742	0.00748436	0.000982414	-
APR13C007	SH11-2-2	105.644	206.928	40.3344	3.3756	41.693	5.63598	1.161	65.0984	0.11242	0.550259	0.0756571	0.0502223	0.0079958	0.00165141	-	0.0039847	-	0.00307525	0.0121631	-	0.0310948	-	0.00264339	0.00191922
APR13C008	SH11-2-3	108.331	203.752	40.3344	3.33893	40.5293	5.58612	1.18053	65.1123	0.112782	0.550579	0.0730639	0.0470057	0.00701376	0.0013796	-	0.00381545	0.00716357	0.00371932	0.0129505	-	0.0294658	0.00756277	0.00611673	0.00210768
APR13C009	SH11-2-4	106.628	201.629	40.3344	3.29165	39.8521	5.54203	1.15654	65.6697	0.109691	0.557183	0.0746559	0.0451762	0.00577627	0.001135	0.00132419	0.00409008	0.00718494	0.00323336	0.013471	-	0.02838	0.00770531	0.000830836	0.00182285
APR13C010	SH11-2-5	107.177	205.327	40.3344	3.33546	40.4112	5.57347	1.16292	66.1533	0.11507	0.567553	0.0721507	0.051027	0.0062296	0.00125274	0.000908104	0.00192306	0.00716669	0.00285416	0.0124323	0.00351417	0.0264359	0.00775093	0.00158557	0.000982553
APR13D006	SH11-2-1	107.349	192.565	40.3344	3.39406	42.0915	5.77192	1.14435	64.9793	0.105845	0.537794	0.0748895	0.0442164	0.00719364	0.00154444	0.00178408	0.00284629	-	0.00329285	0.0127491	-	0.0326004	0.00778585	0.00239871	0.00104501
APR13D007	SH11-2-2	112.133	200.583	40.3344	3.49986	42.9819	5.75902	1.21101	68.0905	0.101736	0.556139	0.0770645	0.0491951	0.00769811	0.00188154	0.00143335	0.00251089	0.00687239	-	0.014052	-	0.0323659	-	0.00314617	0.00165076
APR13D008	SH11-2-3	106.102	193.352	40.3344	3.38752	42.1285	5.85178	1.13318	68.9511	0.10811	0.533612	0.0765019	0.0451329	0.00665604	0.00130348	0.00162302	0.00209484	0.00705587	0.0032071	0.0122701	-	0.0321332	0.00788223	0.00363833	0.00109503
APR13B004	KL2-G	17854.1	73355.5	50.3062	33.5283	15574.8	303.401	87.3485	97.6257	21.0313	1.3804	22.3123	137.289	12.001	32.2395	5.15539	5.78965	5.20757	0.964367	2.44743	0.326641	2.02483	0.279036	3.97696	0.981932
APR13B052	KL2-G	18130.6	74512.8	50.3062	34.6346	15799.9	304.683	88.6429	96.8104	20.4414	1.28752	23.0506	139.112	12.4081	33.1171	5.20899	5.73587	5.11858	0.990016	2.48045	0.346622	2.03784	0.293241	4.04124	0.997132
APR13C004	KL2-G	18198.9	75726	50.3062	33.4403	15710.7	306.787	87.0859	97.0089	21.5061	1.42299	27.3123	157.225	15.753	31.2911	5.78422	6.19781	5.49248	1.02642	2.70168	0.365941	2.04489	0.296967	3.80716	0.960475
APR13C050	KL2-G	18582.2	75782.9	50.3062	33.6564	15479.9	307.293	91.0477	99.6856	21.5423	1.37679	27.6863	155.158	15.5608	31.3994	5.87807	6.18485	5.45951	1.03112	2.71759	0.370188	2.01696	0.292967	3.78945	0.963322
APR13D004	KL2-G	17851.3	71505.5	50.3062	31.8142	14573.3	294.509	84.5036	106.015	20.911	1.40787	24.5439	143.179	14.3908	30.5885	5.2526	5.84689	5.28569	0.959394	2.64589	0.341568	2.02174	0.278758	3.98648	0.89932
APR13D048	KL2-G	18476	71694.8	50.3062	32.933	15189	308.273	85.9867	101.688	21.1519	1.43633	26.8554	147.204	15.6284	32.8257	5.6599	6.02428	5.31875	1.02471	2.69796	0.358481	2.05371	0.301695	4.02362	0.9684
APR13E004	KL2-G	16507.8	69804.4	50.3062	33.1859	14851.2	296.959	87.6747	109.256	20.8778	1.44304	26.6488	151.93	15.0116	31.6059	5.4604	5.93863	5.249	0.99524	2.61929	0.357881	2.1199	0.292714	3.95947	0.947765
APR13E034	KL2-G	16779.7	68120.1	50.3062	31.1265	15025.2	296.073	89.0636	103.974	20.9769	1.35898	25.5704	148.931	14.7876	31.737	5.21199	5.60024	4.96233	0.944553	2.5329	0.339367	1.9784	0.278246	3.76436	0.91557
"-" repersents below detection limit.

## Sheet: Table S6
Table S6 Elements concentrations of olivine monitor standard MongOL Sh11-2 obtained under conditions of Sets A、B、C.
Sh11-2	Set A	2SD	Set B	2SD	Set C	2SD
	n=26		n=43		n=15
Li	2.06	0.13	2.08	0.13	-	-
B	-	-	0.48	0.37	-	-
Na	-	-	116.1	6.2	108	6
MgO	-	-	49.3	1.9	-	-
Al	272.8	12.4	272	14	203	10
SiO2	40	-	39.9	1.3	-	-
K	-	-	0.14	0.3	-	-
Ca	728	59	725.7	23.4	-	-
Sc	3.7	0.29	3.62	0.17	3.4	0.3
Ti	41.7	3	40.7	1.7	41.9	3.4
V	5.5	0.2	5.35	0.26	5.7	0.3
Cr	128.8	6.6	126.2	8.6	-	-
Mn	1180	34	1121	44	-	-
FeO	-	-	10.2	0.4	-	-
Co	149.3	4.4	148.2	10.4	-	-
Ni	2925	126	2848	88	-	-
Cu	1.9	0.4	1.17	0.09	1.19	0.06
Zn	62.8	5.5	62.5	11.7	66.5	2.9
Ga	0.1	0.008	0.1	0.02	0.11	0.01
Ge	-	-	0.6	0.07	0.55	0.02
Rb	-	-	0.0007	0.001	-	-
Sr	-	-	0.008	0.002	-	-
Y	0.074	0.004	0.073	0.009	0.073	0.007
Zr	0.048	0.014	0.042	0.014	0.048	0.005
Nb	0.0043	0.0038	0.0042	0.0014	0.0065	0.002
Ba	-	-	0.0007	0.001	-	-
La	-	-	0.00013	0.0002	-	-
Ce	-	-	0.0003	0.0002	0.0015	0.0008
Pr	-	-	0.00011	9e-05	-	-
Nd	-	-	0.0006	0.0008	-	-
Sm	-	-	0.0005	0.0005	0.0014	0.0007
Eu	-	-	0.0003	0.0002	-	-
Gd	0.0018	0.0015	0.0016	0.001	0.0028	0.0018
Tb	-	-	0.0006	0.0003	-	-
Dy	-	-	0.0064	0.0018	0.0071	0.0006
Ho	-	-	0.0025	0.0009	0.0031	0.0007
Er	-	-	0.012	0.002	0.013	0.0019
Tm	-	-	0.003	0.0006	0.0036	0.0006
Yb	0.03	0.007	0.031	0.005	0.031	0.005
Lu	-	-	0.007	0.0007	0.0076	0.0006
Hf	-	-	0.0012	0.003	0.0027	0.003
Ta	-	-	0.0001	0.0002	0.0017	0.001
The content of the elements is in ppm, except for MgO, SiO2 and FeO, which are in wt%.
"-" repersents elements not analyzed.

## Sheet: Table S7
Table S7 EPMA results for olivines from serpentinites at Yinshanzhai of the Hong'an orogen and Dongjiashan of the Dabie orogen (%).
Location	Sample name	Spot No.	Na2O	MgO	CaO	TiO2	SiO2	Al2O3	FeO	MnO	NiO	Cr2O3	Total	Fo %
Yinshanzhai, Hong'an	16WD19	C3-1-1	0.027	54.74	0	0	42.033	0.003	2.912	0.163	0.368	0.035	100.281	97.1021
Yinshanzhai, Hong'an	16WD19	C3-1-2	0	54.972	0	0	42.058	0.015	2.985	0.203	0.319	0.013	100.565	97.0438
Yinshanzhai, Hong'an	16WD19	C3-2-1	0.052	54.685	0.003	0	41.872	0	3.061	0.188	0.237	0	100.098	96.9554
Yinshanzhai, Hong'an	16WD19	C3-2-2	0	54.706	0	0	42.124	0.007	2.878	0.259	0.212	0.045	100.231	97.1333
Yinshanzhai, Hong'an	16WD19	C3-3-1	0.01	54.871	0.01	0	41.979	0	2.904	0.147	0.334	0	100.255	97.1166
Yinshanzhai, Hong'an	16WD19	C3-3-2	0	54.208	0.018	0.027	42.043	0	3.143	0.251	0.388	0	100.078	96.8498
Yinshanzhai, Hong'an	16HA46	C4-1-1	0.013	54.372	0.025	0.058	41.969	0	3.378	0.248	0.319	0.024	100.406	96.632
Yinshanzhai, Hong'an	16HA46	C4-1-2	0	54.943	0.01	0	42.005	0	3.208	0.248	0.367	0.069	100.85	96.8283
Yinshanzhai, Hong'an	16HA46	C4-2-1	0	54.104	0	0	42.034	0	3.407	0.261	0.31	0	100.116	96.5879
Yinshanzhai, Hong'an	16HA46	C4-2-2	0.033	53.686	0	0.04	41.919	0.001	3.383	0.284	0.265	0.056	99.667	96.5856
Yinshanzhai, Hong'an	16HA46	C4-3-1	0	54.873	0	0	41.701	0	3.31	0.228	0.379	0	100.491	96.7268
Yinshanzhai, Hong'an	16HA46	C4-3-2	0.006	54.591	0	0	41.137	0	3.26	0.277	0.419	0.013	99.703	96.7585
Dongjiashan, Dabie	21NDB10	A2-1-1	0.004	54.408	0	0	41.861	0.004	2.835	0.224	0.25	0	99.586	97.1599
Dongjiashan, Dabie	21NDB10	A2-1-2	0.021	54.106	0.008	0	41.739	0	2.865	0.267	0.349	0.053	99.408	97.1151
Dongjiashan, Dabie	21NDB10	A2-2-1	0.008	55.126	0.007	0	41.492	0	3.008	0.242	0.308	0	100.191	97.0298
Dongjiashan, Dabie	21NDB10	A2-2-2	0.023	54.597	0	0	41.484	0.029	2.84	0.276	0.284	0.037	99.57	97.1646
Dongjiashan, Dabie	21NDB10	A2-3-1	0	54.468	0.03	0	41.675	0	2.91	0.287	0.25	0	99.62	97.09
Dongjiashan, Dabie	21NDB10	A2-3-2	0	53.682	0	0	41.402	0	3.155	0.31	0.253	0	98.802	96.8081
Dongjiashan, Dabie	21NDB13	C5-1-1	0	54.373	0	0	41.766	0.038	3.136	0.262	0.301	0	99.876	96.8658
Dongjiashan, Dabie	21NDB13	C5-1-2	0.015	54.988	0.03	0.04	41.664	0	2.921	0.257	0.203	0	100.118	97.1062
Dongjiashan, Dabie	21NDB13	C5-2-1	0	55.133	0	0	41.752	0	2.748	0.27	0.225	0.021	100.149	97.2799
Dongjiashan, Dabie	21NDB13	C5-2-2	0	54.484	0.008	0.022	42.408	0	2.833	0.264	0.263	0.024	100.306	97.1657
Dongjiashan, Dabie	21NDB13	C5-3-1	0.006	54.668	0.039	0.049	41.65	0.001	2.991	0.205	0.267	0.029	99.905	97.0221
Dongjiashan, Dabie	21NDB13	C5-3-2	0.048	54.691	0.002	0	42.066	0.03	2.955	0.255	0.254	0.003	100.304	97.0581
	MongOL Sh11-2	Mong-3	0.025	48.826	0.09	0	40.553	0.043	10.342	0.186	0.291	0.042	100.398	89.3793
	MongOL Sh11-2	Mong-4	0.034	48.82	0.1	0.018	40.671	0.053	10.282	0.112	0.421	0.018	100.529	89.4333
	MongOL Sh11-2	Mong-5	0.036	49.279	0.091	0.026	40.748	0.029	10.467	0.159	0.336	0.036	101.207	89.3529
	MongOL Sh11-2	Mong-6	0.029	48.779	0.108	0	40.253	0.039	9.852	0.15	0.392	0.023	99.625	89.8226
	MongOL Sh11-2	Mong-7	0.002	48.247	0.158	0	40.14	0.056	10.032	0.109	0.306	0.005	99.055	89.5537
	MongOL Sh11-2	Mong-1	0.029	48.872	0.071	0	40.679	0.076	10.316	0.084	0.398	0	100.525	89.4121

## Sheet: Table S8
Table S8 Olivine trace element results in Set A for serpentinites from Yinshanzhai, the Hong'an orogen and Dongjiashan, the Dabie orogen.
Location	Spot No.	Li	Al	SiO2	P	Ca	Sc	Ti	V	Cr	Mn	Co	Ni	Zn	Ga	Y	Zr	Nb	Ce	Yb
Yinshanzhai	C3-16WD19-1	0.707423	0.169094	41.9484	26.9875	25.3983	6.03477	0.586009	0.114752	66.4277	1552.15	131.362	2386.71	29.9327	-	0.0128898	0.0748163	-	-	0.0187997
Yinshanzhai	C3-16WD19-2	1.33816	1.84147	41.9484	32.417	12.2088	16.867	0.811436	0.153105	116.106	1651.42	132.513	2089.78	30.8783	-	0.0195902	0.03364	0.00852595	-	0.0346891
Yinshanzhai	C3-16WD19-3	1.63263	0.462242	41.9484	28.1028	24.4297	21.0437	0.836877	0.210045	143.004	1631.97	132.951	2109.79	27.6809	-	0.018962	0.0889154	0.00928133	-	0.0357866
Yinshanzhai	C3-16WD19-4	0.375273	0.0134304	41.9484	28.5993	23.0825	2.28495	0.147856	0.0316589	7.71075	1520.09	150.053	3243.43	25.8975	-	0.00454445	0.00533199	0.00948748	-	-
Yinshanzhai	C3-16WD19-5	0.113914	0.109453	41.9484	25.6829	-	2.06093	0.152062	0.0637562	13.5707	1385.51	139.126	2832.72	21.4893	-	-	0.00217247	0.00370102	-	0.00146449
Yinshanzhai	C3-16WD19-6	0.722199	0.385934	41.9484	30.3699	-	9.68172	0.848975	0.186434	97.4566	1603.5	134.788	2438.77	28.3505	-	0.013995	0.0651119	0.00148931	-	0.0194481
Yinshanzhai	C4-16HA46-1	0.345595	0.161983	41.7248	22.7699	25.6499	5.67621	0.596746	0.258646	9.75779	1916.34	167.656	2830.14	40.1147	0.00393035	-	-	-	-	-
Yinshanzhai	C4-16HA46-2	0.365146	0.188876	41.7248	23.315	-	4.35306	2.67307	0.303034	12.1956	2198.98	187.147	3129.41	51.754	0.00362425	-	-	-	-	-
Yinshanzhai	C4-16HA46-3	0.222199	0.213458	41.7248	24.4235	11.3645	2.39927	0.643997	0.257381	9.1494	2017.87	174.416	2953.55	49.8836	0.00313393	0.00259828	-	-	-	0.0137467
Yinshanzhai	C4-16HA46-4	0.132685	0.181073	41.7248	18.9371	17.7955	1.55168	1.78658	0.205446	23.707	2027.16	175.419	3072.31	47.4102	0.00266393	-	-	0.00335066	-	0.00913433
Yinshanzhai	C4-16HA46-5	0.469916	0.114295	41.7248	19.8439	25.7345	6.71152	3.43696	0.736143	30.8809	2101.13	182.244	3222.21	48.717	-	-	-	-	-	-
Yinshanzhai	C4-16HA46-6	0.0877959	0.141775	41.7248	20.3297	-	2.13206	1.98248	0.160383	10.3686	1977.91	170.221	2870.9	40.8708	0.00324983	0.00229307	-	-	-	0.0159163
Dongjiashan	A2-21NDB10-1	0.458013	0.995552	41.5398	26.6246	9.39673	-	-	0.127518	39.4575	2158.07	138.504	2414.72	25.441	0.00435121	0.0618371	0.418556	0.212534	0.0746186	0.0246345
Dongjiashan	A2-21NDB10-2	0.168218	3.8596	41.5398	27.8894	47.3015	-	33.1395	0.373918	92.428	2053.14	132.096	2170.4	27.8724	-	0.022103	0.820374	0.334137	0.0100794	0.0264627
Dongjiashan	A2-21NDB10-3	1.39253	-	41.5398	37.6056	-	30.4069	5.65537	0.344699	93.9144	2111.96	138.836	2465.62	24.8777	0.00361188	0.0880676	2.42268	0.56867	0.00734098	0.123206
Dongjiashan	A2-21NDB10-4	0.791825	-	41.5398	36.6958	-	17.6555	6.12853	0.246696	66.5995	2120.55	138.78	2428.63	27.3426	0.00639063	0.0413026	0.652213	0.229846	0.0265055	0.0516425
Dongjiashan	A2-21NDB10-5	0.575324	-	41.5398	29.9828	31.7718	-	-	0.242522	88.4932	2085	127.306	2217.9	27.6689	-	0.0332429	0.813647	0.263747	0.00329576	0.0422805
Dongjiashan	A2-21NDB10-6	1.10933	2.09556	41.5398	42.273	51.5986	-	64.9796	0.729808	140.862	2159.39	140.574	2476.54	26.8765	0.00410175	0.0561743	1.21165	0.91681	0.00350453	0.110272
Dongjiashan	C5-21NDB13-1	0.315864	-	41.8148	24.2405	-	-	-	0.31347	86.3234	2073.52	134.78	2219.19	34.2515	-	0.0259164	0.808641	-	-	0.0173372
Dongjiashan	C5-21NDB13-2	0.209029	-	41.8148	23.4713	-	3.60557	10.8101	-	-	2079.15	136.029	2439.62	34.5879	-	-	0.696799	0.240995	-	0.0444739
Dongjiashan	C5-21NDB13-3	0.158078	11.8439	41.8148	25.2053	-	2.22171	4.76973	0.161165	25.2738	2182.61	142.167	2525.72	30.0981	0.0117392	0.0633022	0.321244	0.1697	0.071477	0.0235576
Dongjiashan	C5-21NDB13-4	0.92656	-	41.8148	32.6583	-	16.9315	6.48113	0.441458	111.171	2123.82	131.813	2284.37	31.5217	0.0172069	0.0483935	0.913988	0.209114	0.019833	0.0427904
Dongjiashan	C5-21NDB13-5	0.810852	2.15079	41.8148	35.5133	-	12.6081	12.6215	0.306444	60.6859	2163.08	130.285	2297.25	33.1712	-	0.0340396	1.09734	0.341188	0.00467718	0.0348698
Dongjiashan	C5-21NDB13-6	0.57885	65.5917	41.8148	29.9381	-	16.1872	5.24609	0.281848	85.7509	2101.04	138.428	2430.6	33.4203	0.012053	0.0972952	1.2377	0.329018	0.0615562	0.0495777
The content of the elements is in ppm, except for SiO2, which are in wt%.
"-" repersents below detection limit.

## Sheet: PlotDat1
Source sheet	S5 Zrn-U-Pb	0.3	601.267	1	605.024	9.10051	5	617.831	6.77709
Plot name	Average1	22.7	601.267	2	609.855	9.43282	IsoLine	IsoLine	IsoLine	IsoLine
Plot Type	15			3	603.517	8.01682
1st free col	11			4	605.86	8.05729
Sigma Level	2			6	600.356	8.42635
Absolute Errs	TRUE			7	604.33	8.04423
Symbol Type	1			8	602.661	9.41785
Inverse Plot	FALSE			9	608.122	9.40772
Color Plot	TRUE			10	603.752	7.13921
3D plot	FALSE			11	601.854	8.65741
Linear	FALSE			12	603.217	9.32625
Data Range	P127:Q148			13	602.793	8.04559
Filled Symbols	FALSE			14	596.558	7.03312
ConcAge	FALSE			15	597.125	4.19549
ConcSwap	FALSE			16	595.388	3.94615
1st Symbol-row	1			17	606.488	3.57874
				18	605.445	3.70272
				19	599.676	3.81942
				20	593.36	4.56629
				21	600.796	4.04229
				22	602.127	4.94234
				IsoLine	IsoLine	IsoLine	IsoLine

## Sheet: Table S9
Table S9 Olivine trace element results in Set B for serpentinites from Yinshanzhai, the Hong'an orogen and Dongjiashan, the Dabie orogen.
Location	Spot No.	Fo	Li	B	Na	MgO	Al	SiO2	P	K	Ca	Sc	Ti	V	Cr	Mn	FeO	Co	Ni	Cu	Zn	Ga	Ge	As	Rb	Sr	Y	Zr	Nb	Ba	La	Ce	Pr	Nd	Sm	Eu	Gd	Tb	Dy	Ho	Er	Tm	Yb	Lu	Hf	Ta
Yinshanzhai	C3-01	96.9059	0.24517	110.845	0.613817	55.7702	0.22713	40.382	4.01487	0.0690656	12.1383	3.05153	0.386655	0.0443127	4.41192	1316.04	3.17417	153.92	2760.15	0.0133765	21.8937	0.00199218	0.700587	0.105283	-	0.00219346	0.00298181	0.00374707	0.00361642	0.0174312	0.000347156	0.000528548	9.22574e-05	0.000723898	0.000173334	2.88397e-05	-	2.08546e-05	0.000515826	2.14587e-05	0.000631616	0.000264168	0.0024002	0.000670173	0.000140096	0.000241382
Yinshanzhai	C3-02	96.9379	0.2695	119.545	-	55.7601	-	40.3776	4.18626	0.0386981	12.4124	1.89462	0.472406	0.134446	-	1302.59	3.13965	136.057	3005.53	0.00535689	27.877	0.00143646	0.551086	0.191723	-	0.00439621	0.00582874	0.0192417	0.00238807	0.0125641	0.00111093	0.00172219	0.00018929	0.00121737	0.000379906	0.000166118	-	6.01053e-05	0.00061882	0.000247148	0.00171623	0.000690166	0.00793796	0.00137953	0.00100733	0.000129603
Yinshanzhai	C3-03	96.8134	0.464527	101.232	0.547342	55.3533	0.219913	40.6537	3.9897	-	12.7251	3.66377	0.394581	0.044036	9.76235	1437.15	3.24768	151.916	3197.42	0.000744413	27.6622	0.00114098	0.58559	0.0759548	0.000604224	0.000428683	0.00340725	0.00430493	0.00128757	0.00117365	1.39515e-05	4.73385e-05	3.0371e-05	-	-	3.29389e-05	0.000131615	-	0.000294403	0.000146983	0.00119982	0.00029769	0.0046463	0.00156917	-	0.000149667
Yinshanzhai	C3-05	96.7742	0.374371	103.907	0.236737	56.0888	0.453037	39.8437	3.425	0.248659	11.0398	3.22143	0.396301	-	-	1432.95	3.33262	148.262	3080.2	0.00539401	24.5457	0.0010423	0.572085	0.165705	0.00152237	0.000590146	0.00332671	0.00262962	0.00198228	0.00267842	0.000214031	0.000194532	3.13631e-05	0.000126017	0.000178719	3.00016e-05	0.000240064	-	-	0.000178417	0.00134901	0.000558628	0.00620441	0.00274669	0.000185199	0.000113054
Yinshanzhai	C3-06	96.8723	0.302915	97.6244	-	56.3146	0.147408	39.7226	6.09304	0.0137555	12.203	2.53394	0.438885	0.0603113	-	1398.57	3.24103	146.791	3070.14	0.0142882	23.4131	0.00201952	0.595213	0.0592515	0.000394918	0.00225887	0.00235776	0.00254152	0.00195676	0.00566052	8.79606e-05	5.3125e-05	4.87175e-05	-	0.000112968	-	0.000229693	2.07609e-05	0.000255972	0.000106487	0.000625939	0.000355023	0.00521564	0.0012542	6.89717e-05	0.000129418
Yinshanzhai	C3-07	96.856	0.360683	98.4717	0.0678301	56.3111	-	39.7573	3.63633	-	11.18	3.88994	0.399411	0.0489571	4.77256	1265.82	3.25824	143.98	2830.06	0.00715657	21.2978	0.00297171	0.591718	0.098619	0.000146486	0.00105374	0.00210215	0.00415202	0.00195854	0.00050396	0.000161613	0.000263674	5.83059e-05	-	0.000247092	-	-	4.06111e-05	0.000166977	7.71015e-05	0.00108937	0.000463416	0.00765757	0.00226455	0.000384486	3.58864e-05
Yinshanzhai	C3-08	96.8435	0.495139	102.601	0.0226764	56.0633	-	39.9615	5.13502	0.112086	10.5625	4.06815	0.416462	-	-	1362.62	3.25726	140.164	3068.55	0.00826163	23.8651	-	0.617095	0.115097	-	0.000475906	0.00274585	0.00333562	0.00289079	0.00404513	0.000157748	0.000203623	4.20965e-05	-	-	2.34583e-05	0.000112687	-	8.36918e-05	8.35519e-05	0.000614564	0.000534502	0.00604978	0.00194976	6.75834e-05	6.17317e-05
Yinshanzhai	C3-09	96.77	0.210116	107.228	1.06319	55.7863	-	40.2271	4.94182	0.127558	10.276	2.6636	0.433961	-	-	1397.7	3.31911	144.71	2607.37	0.00750595	24.4144	0.00323487	0.705434	0.0854193	-	0.00205901	0.00137232	0.00135374	0.00226016	0.00492072	8.73402e-05	0.000293743	1.72466e-05	0.000179561	0.000120038	3.04163e-05	-	2.19707e-05	-	0.000135386	0.000664252	0.000246163	0.00352021	0.000698534	-	0.000228694
Yinshanzhai	C4-01	96.4777	0.233863	105.242	-	55.5108	0.422563	40.144	5.11174	-	12.74	2.6765	1.32988	0.192033	5.3692	1779.2	3.61254	158.42	2648.07	0.0194663	36.7815	0.00510687	0.447242	0.0879188	0.000851722	0.0162077	0.00360913	0.0120024	0.00475544	0.436101	0.000167772	0.00048296	0.000113028	0.00100824	7.86959e-05	5.97101e-05	-	-	0.000354973	4.42905e-05	0.000870186	0.000217191	0.00814965	0.00117115	0.000500849	0.00069164
Yinshanzhai	C4-02	96.5406	0.381547	86.2861	-	55.7032	0.100101	40.019	4.93141	0.189436	9.85561	-	-	0.223947	-	1794.12	3.55806	157.658	2585.28	0.0103316	40.6926	0.006078	0.531869	0.0476347	-	0.000535018	0.00214718	0.00338319	0.0015003	0.00102203	0.000127583	0.00017878	2.57796e-05	-	2.99205e-05	-	-	-	0.000235957	1.68223e-05	0.000413375	0.000187595	0.00300248	0.00121011	-	4.26566e-05
Yinshanzhai	C4-03	96.3185	0.188847	94.8433	0.578379	55.822	0.370561	39.5924	5.45074	-	11.9088	1.80186	2.2475	0.145979	7.4042	1936.8	3.80332	166.757	2854.06	0.0219519	34.2253	0.00128973	0.451277	0.0537383	0.00189922	0.0099996	0.00109322	0.00053798	0.0029052	0.0896333	0.000162166	0.000524684	4.09497e-05	0.000456409	0.000142608	3.60242e-05	0.000144198	2.59549e-05	0.000107003	8.00966e-05	0.000437632	0.000238329	0.00476726	0.00186857	8.61782e-05	0.000325047
Yinshanzhai	C4-06	96.3666	0.289618	97.8557	-	55.5299	0.216535	39.9628	4.38856	-	15.7596	2.92593	6.41091	0.381738	8.39303	1875.63	3.73209	164.932	2850.87	0.0121979	44.1334	0.00434315	0.388517	0.080711	0.000136888	0.00159976	0.0032268	0.00316458	0.00253487	0.0146336	0.000262125	0.000703566	7.86905e-05	0.000254012	0.000119155	0.00011431		0.000129728	0.00016066	0.000200367	0.000365169	0.000621966	0.00666847	0.00205901	0.000129156	0.000429498
Yinshanzhai	C4-07	96.3479	0.350958	84.2959	0.922556	55.7827	0.14029	39.7062	4.15128	0.211888	9.43955	3.30629	5.55432	0.342336	5.77137	1778.08	3.76912	157.944	2734.63	0.0172739	42.0664	0.00129226	0.452178	0.090365	0.000951355	0.00224879	0.00220005	0.000538435	0.00166838	0.00192836	5.65682e-05	0.000235254	3.38712e-05	7.54295e-05	0.000141485	7.15681e-05	0.000143108	5.14191e-05	0.000212247	5.2931e-05	0.000953976	0.000443469	0.00710163	0.00117194	-	0.000161236
Yinshanzhai	C4-08	96.3109	0.412835	95.2147	-	55.6407	0.0845737	39.8201	4.04739	0.463622	9.61805	3.02666	0.441048	0.193265	4.90641	1745.3	3.79902	158.394	2731.62	0.0143092	38.263	0.00324864	0.405483	0.0226514	0.000456015	0.00034334	0.00184819	-	0.00143634	0.000536709	7.44787e-05	4.95938e-05	9.06569e-05	0.00012616	-	-	-	3.87425e-05	0.000177674	6.64514e-05	0.000870057	0.000593654	0.00738264	0.00163065	7.13937e-05	0.000157442
Yinshanzhai	C4-10	96.4996	0.304062	80.4567	-	55.8762	0.240594	39.7143	4.88861	-	10.1203		3.99692	-	-	1877.34	3.61286	168.566	3086.93	0.0068755	42.3226	0.00399765	0.392971	0.0692767	0.0110351	0.00169727	0.00171442	0.00250381	0.00194912	0.023113	0.000325304	0.000349719	5.247e-05	6.21228e-05	3.62144e-05	2.76312e-05	0.000220637	-	-	0.000101968	0.000799247	0.000341363	0.00776086	0.00231027	-	6.21257e-05
Dongjiashan	C5-10	96.758	0.722878	234.57	4.1856	52.1939	-	43.873	11.3057	0.698934	28.0386	8.4456	4.35306	-	-	2009.82	3.11729	136.018	2330.31	0.00985007	36.0711	0.0433375	0.704393	0.420646	0.00429539	0.0322414	0.0734188	0.674588	0.188477	0.119129	0.0408678	0.0881467	0.00846178	0.0282254	0.0052867	0.00190904	0.00720745	0.00108422	0.00787426	0.00156393	0.00940301	0.00270063	0.0303781	0.00585022	0.0175392	0.0138351
Dongjiashan	C5-3	96.9757	0.190182	294.601	9.59515	54.3523	-	41.8488	6.82034	0.435861	10.5178	2.80542	64.7169	0.697147	112.92	1940.6	3.02144	132.596	2134.27	0.0076624	36.1646	0.024737	0.59466	0.248203	0.00214346	0.0295366	0.0324591	1.08483	0.572392	0.0863028	0.0110271	0.0192383	0.00232124	0.00681714	0.00185542	0.000640321	0.00153968	0.000267152	0.00312942	0.000902925	0.00463458	0.00170123	0.0216646	0.00355545	0.0244801	0.031893
Dongjiashan	C5-7	96.7876	0.520502	248.366	3.38342	52.7938	22.1347	43.3216	9.98935	0.173955	38.8701	5.00347	8.81627	0.215386	73.395	1897.31	3.12344	136.743	2351.74	0.0242171	40.1309	0.0143859	0.713692	0.345937	0.00266459	-	0.0333697	0.652139	0.197238	-	0.0131061	0.0290879	0.00312234	0.0114275	0.00275214	0.000364641	0.00217688	0.000361031	0.00200298	0.000950145	0.00820102	0.00169892	0.0156165	0.00495419	0.0180767	0.0123376
Dongjiashan	C5-8	96.8546	0.195889	280.382	-	52.6597	-	43.5031	4.06981	0.18736	36.1412	3.54185	51.9564	0.559813	124.352	1949.12	3.04841	133.299	2293.37	0.0290305	39.2751	0.0101004	0.76658	0.415032	0.00367306	0.0147236	0.0366222	0.880605	0.427543	0.0362381	0.0271354	0.0622768	0.00580575	0.0188146	0.00396838	0.00151228	0.00598695	0.00070268	0.00557404	0.00159984	0.00702773	0.00222883	0.0194932	0.00481816	0.0217503	0.0242247
Dongjiashan	C5-9	96.8459	0.428056	268.337	-	53.8058	-	42.2515	12.7793	2.94653	38.5413	3.88315	11.6848	0.358617	73.2474	2052.13	3.12366	138.648	2482.3	0.0386967	35.1585	0.0247238	0.882387	0.651645	0.00482766	-	0.0797177	0.973734	0.348596	-	0.0433899	0.0885683	0.00890085	0.0338224	0.0066432	0.00197741	0.0101143	0.000928778	0.0113595	0.00260878	0.0108595	0.00262206	0.0372853	0.00805022	0.0255596	0.0216323
The content of the elements is in ppm, except for MgO, SiO2 and FeO, which are in wt%.
"-" repersents below detection limit.

[truncated: 1 more sheets: Table S10]
